## Corrigendum

# USP15 regulates dynamic protein–protein interactions of the spliceosome through deubiquitination of PRP31

Tanuza Das<sup>1</sup>, Joon Kyu Park<sup>2</sup>, Jinyoung Park<sup>1</sup>, Eunji Kim<sup>2</sup>, Michael Rape<sup>3,4</sup>, Eunice EunKyeong Kim<sup>2,\*</sup> and Eun Joo Song<sup>1,\*</sup>

<sup>1</sup>Molecular Recognition Research Center, Korea Institute of Science and Technology, Hwarangno 14-gil 5, Seongbuk-gu, Seoul 02792, Korea, <sup>2</sup>Biomedical Research Institute, Korea Institute of Science and Technology, Hwarangno 14-gil 5, Seongbuk-gu 02792, Seoul, Korea, <sup>3</sup>Department of Molecular and Cell Biology, University of California, Berkeley, CA 94720, USA and <sup>4</sup>Howard Hughes Medical Institute, University of California, Berkeley, Berkeley, CA 94720, USA

*Nucl. Acids Res.* (2017) doi: 10.1093/nar/gkw1365

The Authors wish it to apologise for errors in Figure 7D and Funding. A new figure and Funding statement are provided below. These errors have also been corrected in the original article.

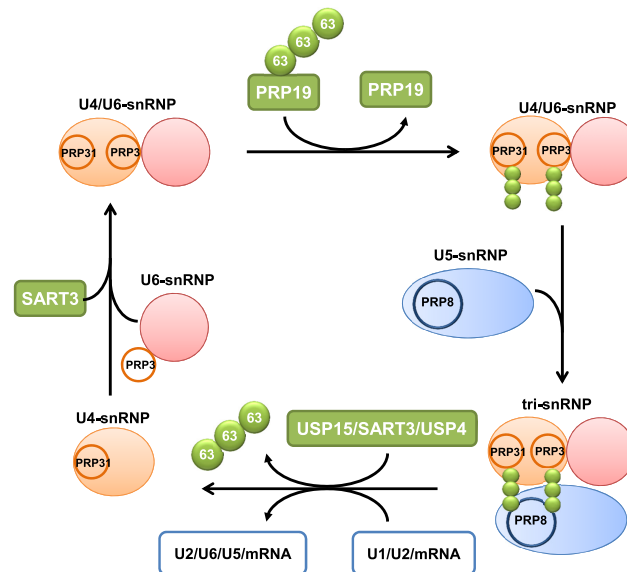

**Figure 7D.** Working model of USP15 and USP4 mediated regulation of the spliceosome. Both PRP31 and PRP3, the U4/U6 snRNP components, are ubiquitinated by PRP19 with K63-linked ubiquitin chain. Ubiquitinated PRP31 and PRP3 in turn are recognized by U5 snRNP component PRP8 via its JAMM domain, and this may help the formation of the stabilized U4/U6.U5 tri-snRNP complex. Followed by successful docking of the U4/U6.U5 tri-snRNP complex at the spliceosome, PRP31 and PRP3 are deubiquitinated by the USP15–SART3–USP4 complex, thereby decreasing the affinity towards PRP8 possibly resulting in the dissociation of the U4 snRNA from the tri-snRNP complex. Release of U4 snRNP facilitates pre-mRNA splicing of cell cycle regulatory genes, especially Bub1 and  $\alpha$ -tubulin, by the active spliceosome complex.

\*To whom correspondence should be addressed. Tel: +82 2 958 5086; Fax: +82 2 958 5170; Email: ejsong@kist.re.kr  
Correspondence may also be addressed to Eunice EunKyeong Kim. Tel: +82 2 958 5937; Fax: +82 2 958 5909; Email: eunice@kist.re.kr

## **FUNDING**

National Research Foundation of Korea (NRF) grant funded by the Korea government (MSIP) [20110021713 and 2015R1A2A2A04005596]. Funding for open access charge: National Research Foundation of Korea (NRF) grant funded by the Korea government (MSIP) [20110021713 and 2015R1A2A2A04005596].
